# Supplementary material for: The circular RNA circEIF3M promotes breast cancer progression by promoting cyclin D1 expression
Source: publisher site journal article supplement (doi:10.18632/aging.103539), 2020-07-11
Supplement: Supplementary file [file aging-v12i14-103539-supplementary-material-SD1.pdf]

## SUPPLEMENTARY FIGURES

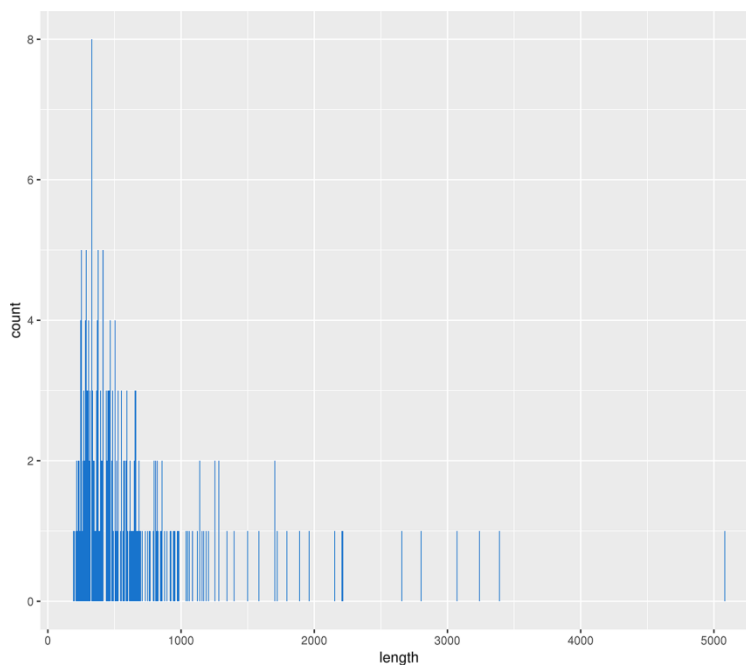

**Supplementary Figure 1. Density of spliced length of the detected circRNAs.**

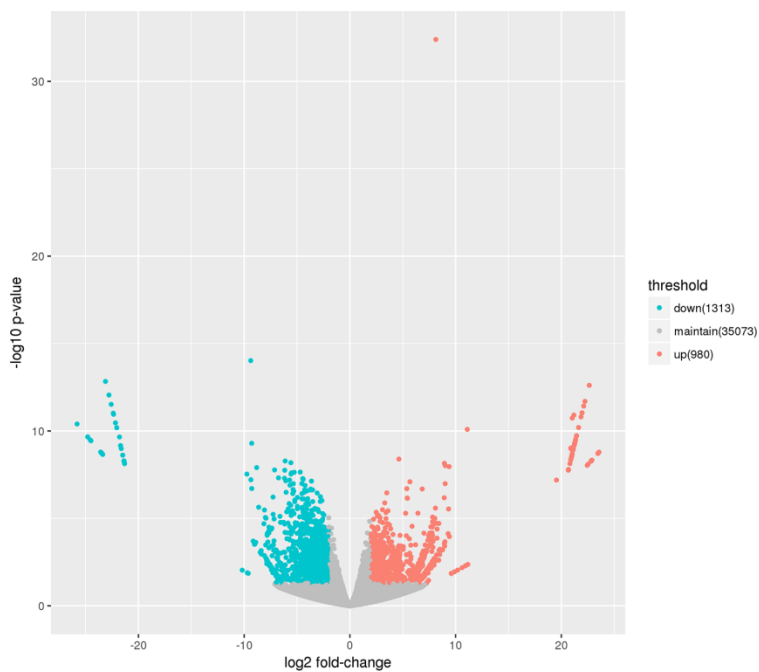

**Supplementary Figure 2. Volcano plot of differentially expressed circRNAs in TNBC.** The vertical green lines correspond to two-fold increased and decreased expression, and the horizontal green line represents. The red points represent circRNAs that were differentially expressed with statistical significance.



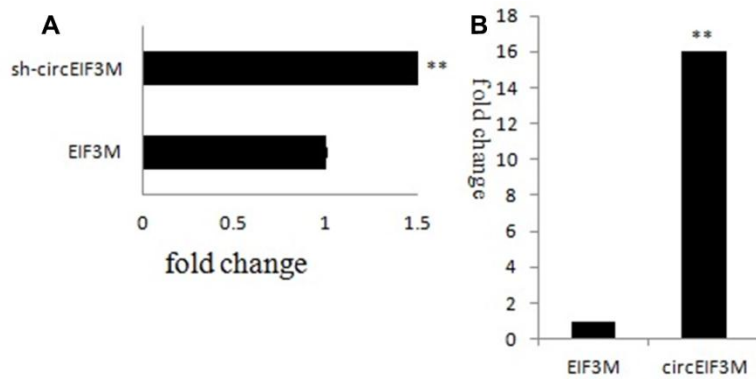

**Supplementary Figure 5. The fold changes of circEIF3M and EIF3M gene in 231 cells after transfection against control cells.** The circEIF3M was knocked down (A) and overexpressed (B) in MDA-MB-231 cells respectively. The relative expression of circEIF3M and EIF3M were detected by qRT-PCR after transfection with indicated vectors.

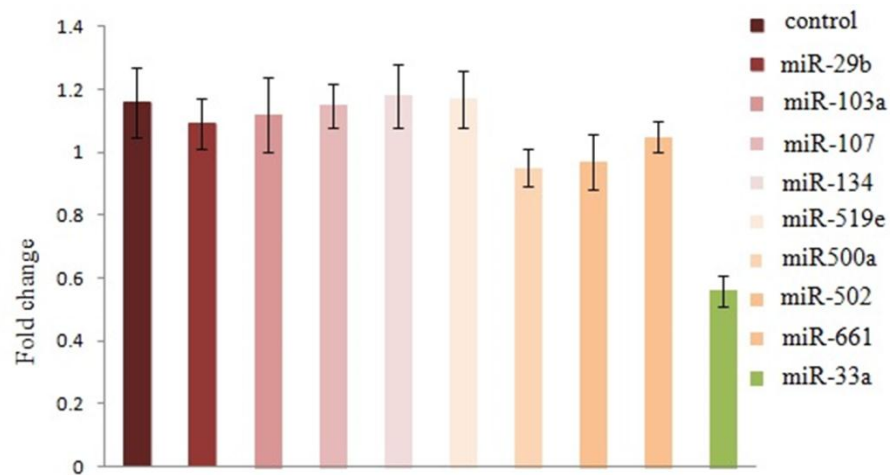

**Supplementary Figure 6. Luciferase reporter assay for the luciferase activity of psiCHECK2-circ against psiCHECK2-circ-M co-transfected with miRNA mimics or negative control of mimics.**
