# Supplementary material for: The circular RNA circEIF3M promotes breast cancer progression by promoting cyclin D1 expression
Source: Aging (Albany NY). 2020 Jul 11;12(14):14775–90. doi: 10.18632/aging.103539 (PMC7425499; doi:10.18632/aging.103539)
Supplement: Supplementary Table 1 [file aging-12-103539-s001..xlsx]

## Sheet: Sheet1
circName	normLog2FoldChange	pvalue	padj	P50012171_normCount	P5002400_normCount	P5003963_normCount	CA50012171_normCount	CA5002400_normCount	CA5003963_normCount	diffState	P50012171	P5002400	P5003963	CA50012171	CA5002400	CA5003963	chrom	start	end	strand	exonCount	circType	geneName	isoformName	flankIntron
chr12:55700898:55701154:-	-7.66263	2.31012e-05	0.871032	7.4513	18.0827	106.975	0	0	0	down	13	20	121	0	0	0	chr12	55700898	55701154	-	1	circRNA	ITGA7	NM_001144996	chr12:55700393-55700898|chr12:55701154-55702871
chr15:54012647:54015886:+	-6.55042	0.000347046	0.929986	5.15859	9.04134	105.207	1.15444	0	0	down	9	10	119	1	0	0	chr15	54012647	54015886	+	1	circRNA	UNC13C	NM_001329919	chr15:53978927-54012647|chr15:54015886-54143017
chr7:22266963:22318037:-	6.26922	0.000568434	0.929986	0.573177	0	0	3.46333	18.9958	41.651	up	1	0	0	3	19	29	chr7	22266963	22318037	-	5	circRNA	WDR44	NM_001184965	chrX:118393271-118394054|chrX:118404444-118406874
chr17:39708320:39710481:+	4.37063	0.000975857	0.929986	14.9026	20.7951	15.0296	13.8533	992.778	41.651	up	26	23	17	12	993	29	chr17	39708320	39710481	+	6	circRNA	WWC3	NM_015691	chrX:10079804-10090770|chrX:10117689-10122618
chr18:36195256:36203189:+	6.07996	0.00103604	0.929986	1.14635	0	0	2.30889	5.99866	81.8657	up	2	0	0	2	6	57	chr18	36195256	36203189	+	4	circRNA	TRMT2B	NM_001167970	chrX:101023616-101035612|chrX:101041371-101042041
chr7:148846469:148847305:-	5.6398	0.00117881	0.929986	0	0.904134	0.884093	3.46333	4.99888	74.6845	up	0	1	1	3	5	52	chr7	148846469	148847305	-	5	circRNA	WDR44	NM_001184965	chrX:118387414-118392631|chrX:118398470-118404337
chr4:61934839:61998265:+	-4.57443	0.00121015	0.929986	30.9515	9.04134	175.935	6.92666	1.99955	0	down	54	10	199	6	2	0	chr4	61934839	61998265	+	8	circRNA	ADGRL3	NM_001322246	chr4:61912757-61934839|chr4:61998265-62028854
chr7:100819556:100820296:-	6.52657	0.00121137	0.929986	0	0	0	3.46333	2.99933	33.0335	up	0	0	0	3	3	23	chr7	100819556	100820296	-	6	circRNA	WDR44	NM_001184965	chrX:118378452-118387339|chrX:118398470-118404337
chr11:32589546:32596047:+	6.20594	0.00147243	0.929986	0	0	0	11.5444	6.99844	12.9262	up	0	0	0	10	7	9	chr11	32589546	32596047	+	6	circRNA	NCBP1	NM_002486	chr9:97648223-97650502|chr9:97656085-97658639
chr9:22046750:22064018:+	6.08839	0.0030604	0.929986	0	0	0	4.61777	2.99933	21.5436	up	0	0	0	4	3	15	chr9	22046750	22064018	+	14	circRNA	DOCK11	NM_144658	chrX:118580179-118584734|chrX:118610418-118614691
chr15:78544868:78546698:+	5.9819	0.00311722	0.929986	0	0	0	4.61777	7.99821	14.3624	up	0	0	0	4	8	10	chr15	78544868	78546698	+	2	circRNA	NR4A3	NM_006981	chr9:99833454-99844648|chr9:99847615-99863619
chr20:56381432:56384324:-	5.92828	0.00350005	0.929986	0	0	0	8.08111	4.99888	12.9262	up	0	0	0	7	5	9	chr20	56381432	56384324	-	5	circRNA	LINC00630	NR_146589	chrX:102884808-102897573|chrX:102905737-102958647
chr16:30479090:30479461:+	5.96627	0.00379611	0.929986	0	0	0	2.30889	9.99777	14.3624	up	0	0	0	2	10	10	chr16	30479090	30479461	+	2	circRNA	WWC3	NM_015691	chrX:10015858-10063444|chrX:10067490-10078798
chr8:94664696:94665196:+	3.72193	0.00425019	0.929986	9.74401	0	5.30456	36.9422	22.9949	142.188	up	17	0	6	32	23	99	chr8	94664696	94665196	+	5	circRNA	DOCK11	NM_144658	chrX:118566653-118568078|chrX:118580179-118584734
chr5:55467868:55491114:-	-5.59608	0.00443097	0.929986	4.01224	12.6579	15.0296	0	0	0	down	7	14	17	0	0	0	chr5	55467868	55491114	-	2	circRNA	PLPP1	NM_176895	chr5:55441908-55467868|chr5:55491114-55534571
chrX:150592604:150619139:+	5.84678	0.00452912	0.929986	0	0	0	8.08111	11.9973	4.30872	up	0	0	0	7	12	3	chrX	150592604	150619139	+	2	circRNA	DOCK11	NM_144658	chrX:118652077-118654601|chrX:118654961-118662685
chr4:173247979:173248440:+	5.96884	0.00453686	0.929986	0	0	0	1.15444	13.9969	11.4899	up	0	0	0	1	14	8	chr4	173247979	173248440	+	6	circRNA	ARHGAP6	NM_013423	chrX:11156626-11169504|chrX:11188984-11196924
chr1:45614095:45616393:+	5.5584	0.00462967	0.929986	0.573177	0	0	2.30889	3.99911	33.0335	up	1	0	0	2	4	23	chr1	45614095	45616393	+	7	circRNA	LINC00630	NR_146589	chrX:102846020-102865041|chrX:102905737-102958647
chr10:836402:845055:-	6.16955	0.00486312	0.929986	0	0	0	1.15444	0.999777	28.7248	up	0	0	0	1	1	20	chr10	836402	845055	-	5	circRNA	TSTD2	NM_139246	chr9:97606261-97610345|chr9:97627612-97633242
chr11:103303092:103323990:+	-4.19109	0.00494439	0.929986	23.5002	12.6579	24.7546	1.15444	1.99955	0	down	41	14	28	1	2	0	chr11	103303092	103323990	+	7	circRNA	DYNC2H1	NM_001080463	chr11:103287605-103303092|chr11:103323990-103358242
chr5:69174876:69175537:+	5.47203	0.00496574	0.929986	0.573177	0	0	2.30889	5.99866	28.7248	up	1	0	0	2	6	20	chr5	69174876	69175537	+	9	circRNA	LRCH2	NM_001243963	chrX:115130199-115149826|chrX:115170432-115179426
chr15:38502311:38505920:-	5.80384	0.0049957	0.929986	0	0	0	10.39	8.99799	4.30872	up	0	0	0	9	9	3	chr15	38502311	38505920	-	2	circRNA	TGFBR1	NM_001130916	chr9:99105302-99128854|chr9:99138089-99142535
chr10:126970701:127127764:+	3.35152	0.00504255	0.929986	21.2075	21.6992	38.9001	15.0078	184.959	634.818	up	37	24	44	13	185	442	chr10	126970701	127127764	+	3	circRNA	ZNF782	NM_001001662	chr9:96819778-96827079|chr9:96852005-96852852
chr11:77379240:77379994:-	5.81782	0.00510606	0.929986	0	0	0	5.77222	3.99911	14.3624	up	0	0	0	5	4	10	chr11	77379240	77379994	-	3	circRNA	ANP32B	NM_006401	chr9:97983609-97994630|chr9:98005153-98011270
chr7:65964322:65967907:-	5.8492	0.00529979	0.929986	0	0	0	3.46333	3.99911	17.2349	up	0	0	0	3	4	12	chr7	65964322	65967907	-	2	circRNA	WDR44	NM_001184965	chrX:118397106-118398386|chrX:118404444-118406874
chr10:70844472:70859499:+	5.74467	0.00561746	0.929986	0	0	0	9.23555	4.99888	8.61744	up	0	0	0	8	5	6	chr10	70844472	70859499	+	4	circRNA	TDRD7	NM_014290	chr9:97412238-97428459|chr9:97439318-97441657
chr7:152145152:152149152:-	-5.46906	0.00600867	0.929986	4.01224	11.7537	13.2614	0	0	0	down	7	13	15	0	0	0	chr7	152145152	152149152	-	3	circRNA	KMT2C	NM_170606	chr7:152144881-152145152|chr7:152149152-152150899
chr7:6111124:6115523:+	5.86032	0.00618322	0.929986	0	0	0	8.08111	0.999777	15.7986	up	0	0	0	7	1	11	chr7	6111124	6115523	+	4	circRNA	WDR44	NM_001184965	chrX:118395344-118396969|chrX:118407026-118409488
chr1:21050865:21111383:-	5.72257	0.00652869	0.929986	0	0	0	8.08111	2.99933	11.4899	up	0	0	0	7	3	8	chr1	21050865	21111383	-	1	circRNA	ARMCX5-GPRASP2	NR_146584	chrX:102826169-102826968|chrX:102827144-102839800
chr2:197078702:197090032:-	5.66731	0.0069901	0.929986	0	0	0	4.61777	6.99844	10.0537	up	0	0	0	4	7	7	chr2	197078702	197090032	-	2	circRNA	NUP62CL	NM_017681	chrX:107154246-107167648|chrX:107175193-107193028
chr8:130214555:130236994:-	5.68454	0.00706171	0.929986	0	0	0	3.46333	6.99844	11.4899	up	0	0	0	3	7	8	chr8	130214555	130236994	-	3	circRNA	WDR44	NM_001184965	chrX:118441559-118442243|chrX:118443687-118444359
chr19:23134079:23136043:+	5.08246	0.00776899	0.929986	1.14635	0	0	1.15444	7.99821	35.906	up	2	0	0	1	8	25	chr19	23134079	23136043	+	4	circRNA	CENPI	NM_001318521	chrX:101098539-101101057|chrX:101109998-101120401
chr12:70278131:70311017:+	3.78104	0.00784698	0.929986	1.71953	0	7.95684	11.5444	12.9971	107.718	up	3	0	9	10	13	75	chr12	70278131	70311017	+	2	circRNA	TRIM14	NM_033219	chr9:98084466-98087441|chr9:98092001-98094866
chr2:172558707:172566933:+	4.3175	0.00805552	0.929986	0	0	2.65228	9.23555	24.9944	15.7986	up	0	0	3	8	25	11	chr2	172558707	172566933	+	2	circRNA	MORC4	NM_024657	chrX:106941632-106941937|chrX:106943205-106954912
chr1:24514313:24514567:+	3.33906	0.0087048	0.929986	0.573177	1.80827	5.30456	23.0889	16.9962	35.906	up	1	2	6	20	17	25	chr1	24514313	24514567	+	2	circRNA	ARMCX5-GPRASP2	NR_146584	chrX:102827144-102839800|chrX:102846020-102865041
chr10:21904521:21929141:-	5.65729	0.00895769	0.929986	0	0	0	3.46333	14.9967	2.87248	up	0	0	0	3	15	2	chr10	21904521	21929141	-	4	circRNA	LOC100499484-C9ORF174	NR_036527	chr9:97326669-97328019|chr9:97343563-97354568
chr2:88782733:88792494:+	2.92051	0.00914654	0.929986	6.87812	15.3703	4.42047	18.4711	117.974	64.6308	up	12	17	5	16	118	45	chr2	88782733	88792494	+	7	circRNA	PAK3	NM_001324330	chrX:110944628-111103158|chrX:111163727-111173017
chr12:95137521:95141539:-	5.55919	0.00947397	0.929986	0	0	0	3.46333	7.99821	8.61744	up	0	0	0	3	8	6	chr12	95137521	95141539	-	3	circRNA	TRIM14	NM_033219	chr9:98084466-98087441|chr9:98095029-98099930
chr13:49451552:49461162:+	5.65036	0.00955102	0.929986	0	0	0	13.8533	5.99866	1.43624	up	0	0	0	12	6	1	chr13	49451552	49461162	+	10	circRNA	ANKS6	NM_173551	chr9:98756603-98768080|chr9:98790606-98796132
chr19:40733159:40737769:+	-4.90312	0.00956854	0.929986	4.01224	27.124	7.07275	0	0.999777	0	down	7	30	8	0	1	0	chr19	40733159	40737769	+	3	circRNA	ITPKC	NM_025194	chr19:40729415-40733159|chr19:40737769-40739356
chr17:29285991:29287716:-	3.32912	0.0101235	0.929986	5.73177	12.6579	3.53637	10.39	195.956	12.9262	up	10	14	4	9	196	9	chr17	29285991	29287716	-	6	circRNA	WWC3	NM_015691	chrX:10067490-10078798|chrX:10110020-10116417
chr17:12054888:12081530:+	5.52992	0.0102304	0.929986	0	0	0	3.46333	8.99799	7.1812	up	0	0	0	3	9	5	chr17	12054888	12081530	+	4	circRNA	SRPX2	NM_014467	chrX:100662367-100664773|chrX:100666933-100667273
chr8:99502835:99511512:+	5.51704	0.0102505	0.929986	0	0	0	6.92666	3.99911	8.61744	up	0	0	0	6	4	6	chr8	99502835	99511512	+	2	circRNA	DOCK11	NM_144658	chrX:118568162-118572322|chrX:118574018-118578524
chr8:101543240:101577519:+	5.4218	0.0102741	0.929986	0.573177	0	0	0	6.99844	28.7248	up	1	0	0	0	7	20	chr8	101543240	101577519	+	7	circRNA	WDR44	NM_001184965	chrX:118410959-118432780|chrX:118444494-118448892
chr2:47373462:47375299:+	5.78583	0.0103765	0.929986	0	0	0	1.15444	0.999777	21.5436	up	0	0	0	1	1	15	chr2	47373462	47375299	+	3	circRNA	COL4A5	NM_000495	chrX:108591644-108595508|chrX:108597568-108598701
chr2:227491546:227524915:+	4.97554	0.010767	0.929986	0	0	0.884093	4.61777	9.99777	11.4899	up	0	0	1	4	10	8	chr2	227491546	227524915	+	7	circRNA	FRMPD3	NM_032428	chrX:107525652-107526581|chrX:107554504-107560256
chr2:172568740:172596023:+	5.33944	0.0112269	0.929986	0.573177	0	0	0	21.9951	11.4899	up	1	0	0	0	22	8	chr2	172568740	172596023	+	5	circRNA	MORC4	NM_001085354	chrX:106943205-106954912|chrX:106962110-106976583
chr19:58392975:58393487:+	5.17261	0.0112704	0.929986	0.573177	0	0	2.30889	1.99955	25.8523	up	1	0	0	2	2	18	chr19	58392975	58393487	+	13	circRNA	CENPI	NM_001318521	chrX:101098539-101101057|chrX:101132456-101140665
chr17:28908782:28927063:-	5.52592	0.0113218	0.929986	0	0	0	4.61777	11.9973	2.87248	up	0	0	0	4	12	2	chr17	28908782	28927063	-	5	circRNA	WWC3	NM_015691	chrX:10067490-10078798|chrX:10098579-10109777
chr1:12275824:12278038:+	-4.33093	0.0114922	0.929986	8.59765	25.3157	13.2614	2.30889	0	0	down	15	28	15	2	0	0	chr1	12275824	12278038	+	1	circRNA	VPS13D	NM_015378	chr1:12273135-12275824|chr1:12278038-12279498
chr17_KI270857v1_alt:1415265:1417362:-	5.58225	0.0116544	0.929986	0	0	0	1.15444	4.99888	14.3624	up	0	0	0	1	5	10	chr17_KI270857v1_alt	1415265	1417362	-	4	circRNA	TRMT2B	NM_001167970	chrX:101019403-101020486|chrX:101023616-101035612
chr3:183205875:183207823:-	5.53403	0.0117042	0.929986	0	0	0	2.30889	12.9971	4.30872	up	0	0	0	2	13	3	chr3	183205875	183207823	-	10	circRNA	PAK3	NM_001128166	chrX:111142196-111147736|chrX:111196640-111216420
chr8:70674817:70707153:+	4.50109	0.0120489	0.929986	1.71953	0	0	2.30889	33.9924	7.1812	up	3	0	0	2	34	5	chr8	70674817	70707153	+	22	circRNA	DOCK11	NM_144658	chrX:118496073-118542724|chrX:118599228-118605237
chr6:130926604:130956499:-	-2.68888	0.0121454	0.929986	126.099	131.099	570.24	79.6566	26.994	21.5436	down	220	145	645	69	27	15	chr6	130926604	130956499	-	3	circRNA	EPB41L2	NM_001350299	chr6:130908863-130926604|chr6:130956499-130970282
chr10:179993:249088:+	4.48812	0.0122355	0.929986	0.573177	0	0.884093	2.30889	17.996	12.9262	up	1	0	1	2	18	9	chr10	179993	249088	+	13	circRNA	ANKRD18CP	NR_136286	chr9:97162846-97170606|chr9:97211487-97238422
chr1:168183901:168191500:+	5.45876	0.0124129	0.929986	0	0	0	10.39	3.99911	4.30872	up	0	0	0	9	4	3	chr1	168183901	168191500	+	6	circRNA	ARMCX5-GPRASP2	NR_146587	chrX:102721027-102816991|chrX:102846020-102865041
chr9:124804093:124804342:+	-5.2354	0.0128179	0.929986	15.4758	7.23307	1.76819	0	0	0	down	27	8	2	0	0	0	chr9	124804093	124804342	+	1	circRNA	OLFML2A	NM_182487	chr9:124801663-124804093|chr9:124804342-124807780
chr10:1084402:1096246:+	4.9676	0.0131259	0.929986	0	0	0.884093	3.46333	3.99911	18.6711	up	0	0	1	3	4	13	chr10	1084402	1096246	+	3	circRNA	ZNF510	NM_001314059	chr9:96760477-96763117|chr9:96774846-96775999
chr11:47422573:47422973:-	4.98244	0.013836	0.929986	0	0	0.884093	2.30889	3.99911	20.1074	up	0	0	1	2	4	14	chr11	47422573	47422973	-	5	circRNA	NCBP1	NM_002486	chr9:97651373-97653797|chr9:97658743-97660945
chr16:84733434:84745673:+	5.5087	0.013981	0.929986	0	0	0	1.15444	3.99911	14.3624	up	0	0	0	1	4	10	chr16	84733434	84745673	+	7	circRNA	WWC3	NM_015691	chrX:10015858-10063444|chrX:10098579-10109777
chr1:110222963:110226178:+	-4.11071	0.0142583	0.929986	5.15859	15.3703	22.1023	1.15444	0	1.43624	down	9	17	25	1	0	1	chr1	110222963	110226178	+	2	circRNA	KCNC4	NM_001039574	chr1:110212177-110222963|chr1:110226178-110232910
chr11:46493607:46512813:-	5.47796	0.0144515	0.929986	0	0	0	1.15444	4.99888	12.9262	up	0	0	0	1	5	9	chr11	46493607	46512813	-	4	circRNA	NCBP1	NM_002486	chr9:97651373-97653797|chr9:97656085-97658639
chr1:220579353:220618755:+	-4.60639	0.014664	0.929986	10.3172	15.3703	5.30456	0	0	1.43624	down	18	17	6	0	0	1	chr1	220579353	220618755	+	8	circRNA	MARK1	NM_001286124	chr1:220528873-220579353|chr1:220618755-220631034
chr9:83677726:83686155:-	4.52599	0.0148002	0.929986	1.14635	0	0	6.92666	7.99821	15.7986	up	2	0	0	6	8	11	chr9	83677726	83686155	-	13	circRNA	DOCK11	NM_144658	chrX:118599228-118605237|chrX:118636412-118638079
chr8:30474778:30504436:+	-3.37133	0.0151824	0.929986	8.02448	16.2744	67.1911	4.61777	3.99911	0	down	14	18	76	4	4	0	chr8	30474778	30504436	+	4	circRNA	RBPMS	NM_001008712	chr8:30385158-30474778|chr8:30504436-30544493
chr11:77374327:77379994:-	4.82155	0.0155032	0.929986	0	0	0.884093	4.61777	5.99866	12.9262	up	0	0	1	4	6	9	chr11	77374327	77379994	-	2	circRNA	ANP32B	NM_006401	chr9:97983609-97994630|chr9:97998678-98004963
chr14:20403376:20406400:-	4.91022	0.0155895	0.929986	0.573177	0	0	3.46333	2.99933	18.6711	up	1	0	0	3	3	13	chr14	20403376	20406400	-	2	circRNA	ANKS6	NM_173551	chr9:98778424-98780188|chr9:98782573-98783952
chrX:73577406:73584572:+	5.44239	0.0157164	0.929986	0	0	0	2.30889	1.99955	14.3624	up	0	0	0	2	2	10	chrX	73577406	73584572	+	7	circRNA	IL13RA1	NM_001560	chrX:118727726-118741016|chrX:118766976-118773878
chr16:47497398:47596531:+	-4.05373	0.0160415	0.929986	16.049	11.7537	9.72503	1.15444	0.999777	0	down	28	13	11	1	1	0	chr16	47497398	47596531	+	12	circRNA	PHKB	NM_000293	chr16:47461426-47497398|chr16:47596531-47610825
chr10:68468122:68470163:-	3.29241	0.0163143	0.929986	8.02448	0	31.8274	24.2433	89.9799	275.758	up	14	0	36	21	90	192	chr10	68468122	68470163	-	3	circRNA	TDRD7	NM_014290	chr9:97412238-97428459|chr9:97432238-97439244
chr9:65682765:65703014:+	5.33326	0.0168601	0.929986	0	0	0	9.23555	4.99888	2.87248	up	0	0	0	8	5	2	chr9	65682765	65703014	+	12	circRNA	DOCK11	NM_144658	chrX:118599228-118605237|chrX:118630490-118636345
chr4:177353307:177360677:+	3.72853	0.016935	0.929986	0	0	6.18865	6.92666	29.9933	43.0872	up	0	0	7	6	30	30	chr4	177353307	177360677	+	2	circRNA	ALG13	NM_001099922	chrX:111685103-111708026|chrX:111709048-111711674
chr6:158573419:158589782:+	4.46832	0.0170353	0.929986	1.14635	0	0	11.5444	4.99888	12.9262	up	2	0	0	10	5	9	chr6	158573419	158589782	+	6	circRNA	PLS3	NM_001282337	chrX:115629967-115633999|chrX:115643508-115645020
chr15:64203081:64216713:-	4.46645	0.0176943	0.929986	1.14635	0	0	4.61777	8.99799	15.7986	up	2	0	0	4	9	11	chr15	64203081	64216713	-	2	circRNA	LOC101928438	NR_109802	chr9:99596287-99718158|chr9:99805991-99819820
chr19:10258221:10258685:+	5.30984	0.017856	0.929986	0	0	0	2.30889	5.99866	8.61744	up	0	0	0	2	6	6	chr19	10258221	10258685	+	2	circRNA	TRMT2B	NM_001167970	chrX:101038051-101041316|chrX:101042312-101051643
chr5:109817272:109823837:+	5.36564	0.0181391	0.929986	0	0	0	1.15444	4.99888	11.4899	up	0	0	0	1	5	8	chr5	109817272	109823837	+	20	circRNA	ALG13	NM_001099922	chrX:111685103-111708026|chrX:111736879-111744667
chr2:241325992:241336098:+	5.26824	0.0187578	0.929986	0	0	0	8.08111	3.99911	4.30872	up	0	0	0	7	4	3	chr2	241325992	241336098	+	2	circRNA	MID2	NM_012216	chrX:107826430-107840669|chrX:107854704-107903957
chr17:82905935:82911789:+	5.28091	0.0188916	0.929986	0	0	0	9.23555	2.99933	4.30872	up	0	0	0	8	3	3	chr17	82905935	82911789	+	2	circRNA	TRMT2B	NM_001167970	chrX:101019403-101020486|chrX:101021315-101021967
chr1:28742402:28743986:+	3.08235	0.0190195	0.929986	2.86588	0	7.07275	15.0078	35.992	33.0335	up	5	0	8	13	36	23	chr1	28742402	28743986	+	3	circRNA	ARMCX5-GPRASP2	NR_146584	chrX:102827144-102839800|chrX:102865152-102884142
chr4:107944969:107947537:+	-3.7672	0.019142	0.929986	3.43906	17.1785	24.7546	1.15444	1.99955	0	down	6	19	28	1	2	0	chr4	107944969	107947537	+	2	circRNA	CYP2U1	NM_183075	chr4:107932133-107944969|chr4:107947537-107949349
chr18:9931809:9937066:+	3.25873	0.019196	0.929986	1.14635	0	7.07275	13.8533	17.996	45.9597	up	2	0	8	12	18	32	chr18	9931809	9937066	+	4	circRNA	TRMT2B	NM_001167970	chrX:101035683-101036973|chrX:101042312-101051643
chr1:32592930:32593754:+	5.24261	0.0194122	0.929986	0	0	0	5.77222	5.99866	4.30872	up	0	0	0	5	6	3	chr1	32592930	32593754	+	5	circRNA	ARMCX5-GPRASP2	NR_146584	chrX:102827144-102839800|chrX:102897764-102900749
chr16:2262277:2263287:-	4.39017	0.019554	0.929986	1.14635	0	0	10.39	5.99866	11.4899	up	2	0	0	9	6	8	chr16	2262277	2263287	-	3	circRNA	PCDH19	NM_001105243	chrX:100296875-100341902|chrX:100402851-100406450
chr11:74118227:74123135:-	4.70243	0.0196528	0.929986	0.573177	0	0	5.77222	9.99777	5.74496	up	1	0	0	5	10	4	chr11	74118227	74123135	-	8	circRNA	NCBP1	NM_002486	chr9:97651373-97653797|chr9:97663047-97664339
chr6:17661652:17675770:-	5.32695	0.0197095	0.929986	0	0	0	2.30889	1.99955	12.9262	up	0	0	0	2	2	9	chr6	17661652	17675770	-	6	circRNA	MSL3	NM_001282174	chrX:11759875-11760402|chrX:11765729-11768572
chr2:88801098:88804880:+	4.19862	0.0201202	0.929986	1.71953	0	0	3.46333	25.9942	5.74496	up	3	0	0	3	26	4	chr2	88801098	88804880	+	3	circRNA	PAK3	NM_001128166	chrX:111123278-111142095|chrX:111152447-111162914
chr2:161179613:161204793:+	3.52639	0.0209043	0.929986	2.86588	0	0.884093	16.1622	24.9944	4.30872	up	5	0	1	14	25	3	chr2	161179613	161204793	+	9	circRNA	TBC1D8B	NM_017752	chrX:106822202-106823225|chrX:106853650-106854197
chr1:233217898:233227371:-	4.66077	0.0210109	0.929986	0.573177	0	0	5.77222	7.99821	7.1812	up	1	0	0	5	8	5	chr1	233217898	233227371	-	9	circRNA	LINC00630	NR_146589	chrX:102769341-102826968|chrX:102905737-102958647
chr10:89751345:89762835:+	3.60376	0.0212174	0.929986	1.14635	0	1.76819	6.92666	8.99799	20.1074	up	2	0	2	6	9	14	chr10	89751345	89762835	+	10	circRNA	NCBP1	NM_002486	chr9:97643360-97645116|chr9:97656085-97658639
chr12:49494740:49500205:+	5.28042	0.0221732	0.929986	0	0	0	1.15444	10.9975	4.30872	up	0	0	0	1	11	3	chr12	49494740	49500205	+	2	circRNA	ANP32B	NM_006401	chr9:97994780-97998555|chr9:98005153-98011270
chr10:179993:221356:+	3.24099	0.0222826	0.929986	5.73177	0	2.65228	6.92666	12.9971	61.7583	up	10	0	3	6	13	43	chr10	179993	221356	+	3	circRNA	MFSD14C	NR_002894	chr9:96946221-96949554|chr9:96972948-97013258
chr17:4282797:4307123:-	3.52059	0.0223746	0.929986	2.29271	0	0.884093	9.23555	7.99821	21.5436	up	4	0	1	8	8	15	chr17	4282797	4307123	-	7	circRNA	ARL13A	NR_103708	chrX:100969809-100973675|chrX:100988558-100990561
chr6:130184102:130184623:-	5.24801	0.0227475	0.929986	0	0	0	4.61777	9.99777	1.43624	up	0	0	0	4	10	1	chr6	130184102	130184623	-	2	circRNA	PLS3	NM_001282337	chrX:115629967-115633999|chrX:115635046-115636835
chr2:63433744:63439871:-	3.4576	0.0230254	0.929986	1.71953	0	5.30456	8.08111	2.99933	66.0671	up	3	0	6	7	3	46	chr2	63433744	63439871	-	2	circRNA	TMEM164	NM_017698	chrX:110002772-110067346|chrX:110109146-110144797
chr11:11920155:11940548:+	-4.97258	0.0232217	0.929986	3.43906	15.3703	1.76819	0	0	0	down	6	17	2	0	0	0	chr11	11920155	11940548	+	11	circRNA	USP47	NM_001282659	chr11:11905548-11920155|chr11:11940548-11942334
chr4:166039338:166091341:+	-4.90482	0.0235536	0.929986	3.43906	12.6579	3.53637	0	0	0	down	6	14	4	0	0	0	chr4	166039338	166091341	+	10	circRNA	TLL1	NM_012464	chr4:166025431-166039338|chr4:166091341-166099276
chr3:172112451:172133546:+	4.27761	0.0236474	0.929986	0.573177	0.904134	0	1.15444	4.99888	22.9799	up	1	1	0	1	5	16	chr3	172112451	172133546	+	6	circRNA	PAK3	NM_001128166	chrX:111123278-111142095|chrX:111173081-111192126
chr13:21167987:21168399:-	3.52415	0.02379	0.929986	2.86588	1.80827	0	1.15444	16.9962	37.3423	up	5	2	0	1	17	26	chr13	21167987	21168399	-	1	circRNA	TRIM14	NM_014788	chr9:98095029-98099930|chr9:98100164-98109888
chr10:12081471:12084751:+	4.46043	0.0244509	0.929986	1.14635	0	0	8.08111	0.999777	20.1074	up	2	0	0	7	1	14	chr10	12081471	12084751	+	4	circRNA	ZNF510	NM_001314059	chr9:96760477-96763117|chr9:96776245-96777581
chr5:139600371:139614966:+	3.27649	0.0246524	0.929986	2.29271	0	1.76819	12.6989	14.9967	12.9262	up	4	0	2	11	15	9	chr5	139600371	139614966	+	5	circRNA	ARHGAP6	NM_013423	chrX:11169684-11178099|chrX:11188984-11196924
chr9:129807187:129809032:+	5.13505	0.0246544	0.929986	0	0	0	4.61777	5.99866	4.30872	up	0	0	0	4	6	3	chr9	129807187	129809032	+	5	circRNA	DOCK11	NM_144658	chrX:118580179-118584734|chrX:118590302-118593213
chr4:142145839:142193195:-	-5.01722	0.0249835	0.929986	0.573177	16.2744	4.42047	0	0	0	down	1	18	5	0	0	0	chr4	142145839	142193195	-	4	circRNA	INPP4B	NM_001101669	chr4:142124760-142145839|chr4:142193195-142208424
chr4:139342825:139344339:+	5.2016	0.0250502	0.929986	0	0	0	2.30889	1.99955	11.4899	up	0	0	0	2	2	8	chr4	139342825	139344339	+	7	circRNA	ARHGAP6	NM_013423	chrX:11144248-11156528|chrX:11188984-11196924
chrX:10063444:10079804:+	4.5788	0.0252453	0.929986	0.573177	0	0	4.61777	7.99821	7.1812	up	1	0	0	4	8	5	chrX	10063444	10079804	+	4	circRNA	DOCK11	NM_144658	chrX:118605356-118608071|chrX:118610418-118614691
chr17:62029540:62035608:-	-4.10177	0.0255587	0.929986	8.02448	29.8364	0.884093	1.15444	0.999777	0	down	14	33	1	1	1	0	chr17	62029540	62035608	-	5	circRNA	MED13	NM_005121	chr17:62011233-62029540|chr17:62035608-62052536
chr15:41748636:41750615:+	-4.35622	0.0256575	0.929986	4.58541	15.3703	6.18865	0	0.999777	0	down	8	17	7	0	1	0	chr15	41748636	41750615	+	2	circRNA	MGA	NM_001080541	chr15:41740203-41748636|chr15:41750615-41754436
chr8:431340:435707:+	5.16875	0.0260893	0.929986	0	0	0	5.77222	7.99821	1.43624	up	0	0	0	5	8	1	chr8	431340	435707	+	5	circRNA	DOCK11	NM_144658	chrX:118496073-118542724|chrX:118546116-118561382
chrX:85303405:85308216:-	3.36724	0.0263163	0.929986	5.15859	6.32893	0	6.92666	108.976	2.87248	up	9	7	0	6	109	2	chrX	85303405	85308216	-	9	circRNA	IL13RA1	NM_001560	chrX:118727726-118741016|chrX:118776511-118791761
chr6:149512154:149541586:-	-3.96031	0.0264512	0.929986	9.74401	14.4661	9.72503	0	1.99955	0	down	17	16	11	0	2	0	chr6	149512154	149541586	-	11	circRNA	PPIL4	NM_139126	chr6:149505704-149512154|chr6:149541586-149545935
chr6:116689319:116692392:+	3.05144	0.0265066	0.929986	6.87812	11.7537	7.07275	100.437	111.975	0	up	12	13	8	87	112	0	chr6	116689319	116692392	+	5	circRNA	PLS3	NM_001282337	chrX:115561260-115610242|chrX:115629967-115633999
chr1:167765582:167776166:+	2.68821	0.0266812	0.929986	17.7685	13.562	7.95684	10.39	29.9933	214	up	31	15	9	9	30	149	chr1	167765582	167776166	+	3	circRNA	LINC00630	NR_146592	chrX:102769341-102816991|chrX:102839972-102845856
chr5:136147831:136154163:+	-3.45625	0.0267815	0.929986	17.1953	18.0827	15.9137	4.61777	0	0	down	30	20	18	4	0	0	chr5	136147831	136154163	+	3	circRNA	SMAD5	NM_001001419	chr5:136132962-136147831|chr5:136154163-136160855
chr2:58198593:58232112:-	-4.80825	0.0268221	0.929986	5.73177	9.04134	3.53637	0	0	0	down	10	10	4	0	0	0	chr2	58198593	58232112	-	6	circRNA	FANCL	NM_018062	chr2:58165874-58198593|chr2:58232112-58241217
chr15:85715787:85719326:+	5.155	0.0272288	0.929986	0	0	0	4.61777	8.99799	1.43624	up	0	0	0	4	9	1	chr15	85715787	85719326	+	2	circRNA	STX17	NM_017919	chr9:99906706-99915177|chr9:99928843-99951059
chr10:126970701:127037816:+	5.26294	0.0273261	0.929986	0	0	0	1.15444	0.999777	14.3624	up	0	0	0	1	1	10	chr10	126970701	127037816	+	2	circRNA	ZNF510	NM_001314059	chr9:96763632-96774787|chr9:96776245-96777581
chr18:32111753:32113860:+	2.76926	0.0274108	0.929986	16.6221	0	13.2614	38.0966	67.9848	99.1006	up	29	0	15	33	68	69	chr18	32111753	32113860	+	7	circRNA	TRMT2B	NM_001167970	chrX:101021315-101021967|chrX:101042312-101051643
chr4:82874610:82875822:-	5.09597	0.0277767	0.929986	0	0	0	4.61777	6.99844	2.87248	up	0	0	0	4	7	2	chr4	82874610	82875822	-	18	circRNA	ALG13	NM_001099922	chrX:111685103-111708026|chrX:111730580-111735050
chr18:24196124:24239382:-	-3.81931	0.0279611	0.929986	9.17083	10.8496	16.7978	0	0	2.87248	down	16	12	19	0	0	2	chr18	24196124	24239382	-	3	circRNA	OSBPL1A	NM_018030	chr18:24181279-24196124|chr18:24239382-24271621
chr3:12405881:12417154:+	-4.01822	0.0279637	0.929986	5.15859	4.52067	28.291	2.30889	0	0	down	9	5	32	2	0	0	chr3	12405881	12417154	+	2	circRNA	PPARG	NM_005037	chr3:12392752-12405881|chr3:12417154-12433897
chr1:203816925:203831771:+	5.05989	0.0289788	0.929986	0	0	0	3.46333	4.99888	5.74496	up	0	0	0	3	5	4	chr1	203816925	203831771	+	5	circRNA	ARMCX5-GPRASP2	NR_146584	chrX:102721091-102825992|chrX:102865152-102884142
chr5:124643510:124701269:-	-4.30408	0.0294642	0.929986	8.02448	14.4661	2.65228	0	0	1.43624	down	14	16	3	0	0	1	chr5	124643510	124701269	-	5	circRNA	ZNF608	NM_020747	chr5:124641405-124643510|chr5:124701269-124744083
chr14:99257470:99257836:-	4.51962	0.0295449	0.929986	0.573177	0	0	4.61777	9.99777	4.30872	up	1	0	0	4	10	3	chr14	99257470	99257836	-	11	circRNA	COL15A1	NM_001855	chr9:99042107-99044567|chr9:99056404-99059888
chr1:113829591:113834439:-	2.51488	0.029554	0.929986	5.15859	8.1372	8.84093	63.4944	54.9877	7.1812	up	9	9	10	55	55	5	chr1	113829591	113834439	-	6	circRNA	ARMCX4	NR_045861	chrX:101489315-101498144|chrX:101532012-101533083
chr1:155921374:155921918:-	3.72937	0.029562	0.929986	0	0	2.65228	10.39	12.9971	10.0537	up	0	0	3	9	13	7	chr1	155921374	155921918	-	2	circRNA	ARMCX5-GPRASP2	NR_146587	chrX:102721027-102816991|chrX:102827144-102834627
chr1:197595207:197617759:-	5.04862	0.0295979	0.929986	0	0	0	5.77222	3.99911	4.30872	up	0	0	0	5	4	3	chr1	197595207	197617759	-	4	circRNA	ARMCX5-GPRASP2	NR_146584	chrX:102721091-102825992|chrX:102846020-102865041
chr5:40728344:40747019:-	5.1515	0.0296714	0.929986	0	0	0	1.15444	10.9975	2.87248	up	0	0	0	1	11	2	chr5	40728344	40747019	-	5	circRNA	LRCH2	NM_001243963	chrX:115113335-115122526|chrX:115130199-115149826
chr5:143054438:143134105:+	-4.27175	0.0298779	0.929986	4.01224	14.4661	6.18865	0	0	1.43624	down	7	16	7	0	0	1	chr5	143054438	143134105	+	5	circRNA	ARHGAP26	NM_001135608	chr5:143041890-143054438|chr5:143134105-143147230
chr5:14673641:14681607:+	3.50531	0.0299638	0.929986	1.14635	0	2.65228	6.92666	1.99955	34.4698	up	2	0	3	6	2	24	chr5	14673641	14681607	+	4	circRNA	ARHGAP6	NM_013423	chrX:11178248-11179301|chrX:11188984-11196924
chr2:128164729:128171284:+	5.09904	0.029996	0.929986	0	0	0	8.08111	4.99888	1.43624	up	0	0	0	7	5	1	chr2	128164729	128171284	+	9	circRNA	TBC1D8B	NM_198881	chrX:106802983-106818662|chrX:106840884-106848185
chr7:22291174:22318037:-	2.47396	0.0302938	0.929986	13.1831	16.2744	9.72503	9.23555	67.9848	140.752	up	23	18	11	8	68	98	chr7	22291174	22318037	-	6	circRNA	WDR44	NM_001184965	chrX:118393271-118394054|chrX:118407026-118409488
chr2:205158721:205193320:+	-3.24196	0.0303346	0.929986	7.4513	36.1653	10.6091	4.61777	0.999777	0	down	13	40	12	4	1	0	chr2	205158721	205193320	+	5	circRNA	PARD3B	NM_001302769	chr2:205125737-205158721|chr2:205193320-205245777
chr2:172570725:172596023:+	4.01343	0.0303634	0.929986	0	0	1.76819	5.77222	10.9975	10.0537	up	0	0	2	5	11	7	chr2	172570725	172596023	+	3	circRNA	RBM41	NR_136731	chrX:107065758-107067555|chrX:107088839-107113396
chr5:95748332:95783963:+	-4.59684	0.0314575	0.929986	21.7807	0	8.84093	1.15444	0	0	down	38	0	10	1	0	0	chr5	95748332	95783963	+	7	circRNA	RHOBTB3	NM_014899	chr5:95737075-95748332|chr5:95783963-95788761
chr19:11120091:11120522:+	3.21935	0.0320442	0.929986	1.14635	0	3.53637	4.61777	19.9955	18.6711	up	2	0	4	4	20	13	chr19	11120091	11120522	+	2	circRNA	WWC3	NM_015691	chrX:10098579-10109777|chrX:10116507-10117123
chr17:76767385:76776541:+	5.02229	0.03224	0.929986	0	0	0	6.92666	3.99911	2.87248	up	0	0	0	6	4	2	chr17	76767385	76776541	+	3	circRNA	TRMT2B	NM_001167970	chrX:101010707-101018970|chrX:101020588-101021100
chr21:43004325:43024947:+	5.06445	0.0323071	0.929986	0	0	0	2.30889	1.99955	10.0537	up	0	0	0	2	2	7	chr21	43004325	43024947	+	2	circRNA	MID1	NM_001193277	chrX:10474750-10482479|chrX:10495691-10523091
chr1:66946149:66976722:+	-4.7686	0.032456	0.929986	1.71953	11.7537	4.42047	0	0	0	down	3	13	5	0	0	0	chr1	66946149	66976722	+	9	circRNA	MIER1	NM_001077700	chr1:66940052-66946149|chr1:66976722-66981778
chr22:46626750:46637960:+	3.09172	0.0324922	0.929986	5.73177	0	0.884093	19.6255	7.99821	31.5973	up	10	0	1	17	8	22	chr22	46626750	46637960	+	1	circRNA	MID1	NM_001193277	chrX:10523187-10566887|chrX:10567603-10576783
chr7:105481051:105495253:-	4.4807	0.0325535	0.929986	0	0	0.884093	2.30889	8.99799	7.1812	up	0	0	1	2	9	5	chr7	105481051	105495253	-	10	circRNA	WDR44	NM_001184965	chrX:118378452-118387339|chrX:118410959-118432780
chr21:39293810:39298582:-	5.10535	0.0328848	0.929986	0	0	0	2.30889	0.999777	11.4899	up	0	0	0	2	1	8	chr21	39293810	39298582	-	7	circRNA	MID1	NM_001193277	chrX:10455077-10459645|chrX:10567603-10576783
chr6:36524340:36540204:-	5.10535	0.0328848	0.929986	0	0	0	2.30889	0.999777	11.4899	up	0	0	0	2	1	8	chr6	36524340	36540204	-	4	circRNA	MSL3	NM_001282174	chrX:11760937-11762129|chrX:11765729-11768572
chr1:32948221:32949774:-	2.07021	0.0329061	0.929986	22.9271	10.8496	25.6387	72.7299	80.9819	96.2281	up	40	12	29	63	81	67	chr1	32948221	32949774	-	8	circRNA	LINC00630	NR_146589	chrX:102827144-102845856|chrX:102905737-102958647
chr10:3158039:3160330:-	3.75048	0.0333419	0.929986	2.29271	0	0	5.77222	3.99911	24.4161	up	4	0	0	5	4	17	chr10	3158039	3160330	-	2	circRNA	LOC100499484-C9ORF174	NR_036527	chr9:97328146-97330153|chr9:97330767-97343339
chr7:149153944:149154340:+	3.13808	0.0335826	0.929986	2.86588	0	1.76819	5.77222	14.9967	21.5436	up	5	0	2	5	15	15	chr7	149153944	149154340	+	9	circRNA	WDR44	NM_001184965	chrX:118387414-118392631|chrX:118410959-118432780
chr2:28776850:28793997:+	5.0909	0.0336893	0.929986	0	0	0	1.15444	1.99955	11.4899	up	0	0	0	1	2	8	chr2	28776850	28793997	+	4	circRNA	MID2	NM_012216	chrX:107826430-107840669|chrX:107905626-107916001
chr3:66405197:66417266:-	-3.75976	0.0338816	0.929986	9.74401	19.8909	2.65228	0	0.999777	1.43624	down	17	22	3	0	1	1	chr3	66405197	66417266	-	6	circRNA	LRIG1	NM_015541	chr3:66399041-66405197|chr3:66417266-66451558
chr10:863742:885760:-	4.81506	0.0339371	0.929986	0	0	0.884093	0	1.99955	21.5436	up	0	0	1	0	2	15	chr10	863742	885760	-	15	circRNA	NCBP1	NM_002486	chr9:97641662-97643203|chr9:97663047-97664339
chr8:25366869:25369641:+	5.00362	0.034022	0.929986	0	0	0	2.30889	6.99844	4.30872	up	0	0	0	2	7	3	chr8	25366869	25369641	+	3	circRNA	DOCK11	NM_144658	chrX:118496073-118542724|chrX:118543593-118545322
chr10:67887416:67906937:+	4.99195	0.0340518	0.929986	0	0	0	4.61777	5.99866	2.87248	up	0	0	0	4	6	2	chr10	67887416	67906937	+	3	circRNA	LOC100499484-C9ORF174	NR_036527	chr9:97366700-97369921|chr9:97371706-97374542
chr2:61485767:61490776:-	3.36643	0.0341923	0.929986	0.573177	0	3.53637	4.61777	6.99844	30.1611	up	1	0	4	4	7	21	chr2	61485767	61490776	-	13	circRNA	ACSL4	NM_001318510	chrX:109644186-109659353|chrX:109683375-109696143
chr16:87748672:87762040:-	3.06544	0.0350355	0.929986	2.86588	8.1372	0.884093	1.15444	11.9973	86.1744	up	5	9	1	1	12	60	chr16	87748672	87762040	-	8	circRNA	WWC3	NM_015691	chrX:10015858-10063444|chrX:10110020-10116417
chr2:10419733:10420135:+	3.73437	0.0353079	0.929986	0	0	2.65228	6.92666	3.99911	22.9799	up	0	0	3	6	4	16	chr2	10419733	10420135	+	6	circRNA	NRK	NM_198465	chrX:105934444-105935169|chrX:105946464-105949574
chr4:109659010:109664394:+	4.97649	0.0357058	0.929986	0	0	0	3.46333	6.99844	2.87248	up	0	0	0	3	7	2	chr4	109659010	109664394	+	3	circRNA	PAK3	NM_001128166	chrX:111152447-111162914|chrX:111173081-111192126
chr1:59339957:59457076:+	-4.74759	0.0363351	0.929986	2.29271	13.562	1.76819	0	0	0	down	4	15	2	0	0	0	chr1	59339957	59457076	+	4	circRNA	FGGY	NM_001113411	chr1:59321750-59339957|chr1:59457076-59512310
chr16:16007815:16036603:+	5.02544	0.0371196	0.929986	0	0	0	2.30889	9.99777	1.43624	up	0	0	0	2	10	1	chr16	16007815	16036603	+	2	circRNA	STX17	NM_017919	chr9:99951285-99959916|chr9:99960155-99967652
chr12:53381658:53409561:+	4.95664	0.03747	0.929986	0	0	0	6.92666	1.99955	4.30872	up	0	0	0	6	2	3	chr12	53381658	53409561	+	2	circRNA	NANS	NM_018946	chr9:98060997-98076917|chr9:98078347-98080815
chr7:17845594:17850964:-	3.66311	0.0375506	0.929986	2.29271	0	0	4.61777	5.99866	21.5436	up	4	0	0	4	6	15	chr7	17845594	17850964	-	4	circRNA	WDR44	NM_001184965	chrX:118393271-118394054|chrX:118398470-118404337
chr20:53253498:53256571:+	-3.21427	0.0379136	0.929986	13.7562	25.3157	15.0296	5.77222	0	0	down	24	28	17	5	0	0	chr20	53253498	53256571	+	1	circRNA	TSHZ2	NM_173485	chr20:52973333-53253498|chr20:53256571-53487143
chr22:19056985:19063278:-	-4.63686	0.0379432	0.929986	2.86588	8.1372	5.30456	0	0	0	down	5	9	6	0	0	0	chr22	19056985	19063278	-	2	circRNA	DGCR2	NM_001173533	chr22:19048643-19056985|chr22:19063278-19064847
chr14:64029894:64031357:+	4.98813	0.038149	0.929986	0	0	0	1.15444	7.99821	4.30872	up	0	0	0	1	8	3	chr14	64029894	64031357	+	8	circRNA	COL15A1	NM_001855	chr9:98986112-98987293|chr9:99016119-99020388
chr4:53383772:53444103:+	-3.49064	0.0382701	0.929986	10.3172	26.2199	1.76819	2.30889	0.999777	0	down	18	29	2	2	1	0	chr4	53383772	53444103	+	12	circRNA	FIP1L1	NM_001134937	chr4:53382335-53383772|chr4:53444103-53452919
chr10:68025545:68044563:-	-3.34745	0.0384662	0.929986	5.73177	19.8909	9.72503	0	1.99955	1.43624	down	10	22	11	0	2	1	chr10	68025545	68044563	-	5	circRNA	HERC4	NM_001278185	chr10:68014186-68025545|chr10:68044563-68072882
chr10:4830674:4842504:+	3.27865	0.038655	0.929986	0.573177	1.80827	13.2614	2.30889	1.99955	146.497	up	1	2	15	2	2	102	chr10	4830674	4842504	+	3	circRNA	LOC100499484-C9ORF174	NR_036528	chr9:97343563-97347313|chr9:97350555-97354568
chr4:61934839:62044549:+	-5.08245	0.0388987	0.929986	32.6711	0	179.471	1.15444	4.99888	0	down	57	0	203	1	5	0	chr4	61934839	62044549	+	12	circRNA	ADGRL3	NM_001322246	chr4:61912757-61934839|chr4:62044549-62068165
chr10:7367648:7381949:-	3.08005	0.0391904	0.929986	4.01224	0	1.76819	18.4711	28.9935	2.87248	up	7	0	2	16	29	2	chr10	7367648	7381949	-	5	circRNA	TDRD7	NM_014290	chr9:97412238-97428459|chr9:97441875-97460177
chr3:149140003:149145546:+	-4.72424	0.0392655	0.929986	1.14635	13.562	2.65228	0	0	0	down	2	15	3	0	0	0	chr3	149140003	149145546	+	4	circRNA	HPS3	NM_032383	chr3:149129940-149140003|chr3:149145546-149150598
chr12:109167895:109179297:+	-4.61026	0.0396121	0.929986	3.43906	8.1372	4.42047	0	0	0	down	6	9	5	0	0	0	chr12	109167895	109179297	+	7	circRNA	ACACB	NM_001093	chr12:109166993-109167895|chr12:109179297-109179916
chr12:27368261:27380404:+	4.18879	0.039767	0.929986	0	0	1.76819	1.15444	0.999777	28.7248	up	0	0	2	1	1	20	chr12	27368261	27380404	+	1	ciRNA	ANP32B	NM_006401	chr9:97994780-97998555
chr1:111118804:111137586:-	-4.74932	0.0401204	0.929986	0.573177	13.562	3.53637	0	0	0	down	1	15	4	0	0	0	chr1	111118804	111137586	-	7	circRNA	DRAM2	NM_001349881	chr1:111118267-111118804|chr1:111137586-111139500
chr9:710803:713464:+	-4.61199	0.0402802	0.929986	3.43906	9.04134	3.53637	0	0	0	down	6	10	4	0	0	0	chr9	710803	713464	+	1	circRNA	KANK1	NM_001256876	chr9:677009-710803|chr9:713464-730050
chr22:28699837:28734727:-	4.76118	0.0405744	0.929986	0.573177	0	0	1.15444	0	21.5436	up	1	0	0	1	0	15	chr22	28699837	28734727	-	3	circRNA	IL1RAPL2	NM_017416	chrX:104658995-105195474|chrX:105267541-105484312
chr6:83018972:83044659:-	3.6883	0.0407186	0.929986	0.573177	0	1.76819	2.30889	1.99955	25.8523	up	1	0	2	2	2	18	chr6	83018972	83044659	-	2	circRNA	KLHL13	NM_001168302	chrX:117920370-117945433|chrX:118028497-118116507
chr6_GL000256v2_alt:1951752:1952225:+	4.8962	0.0409442	0.929986	0	0	0	5.77222	3.99911	2.87248	up	0	0	0	5	4	2	chr6_GL000256v2_alt	1951752	1952225	+	8	circRNA	WDR44	NM_001184965	chrX:118346580-118378418|chrX:118404444-118406874
chr16:30483826:30484263:+	2.1307	0.0410138	0.929986	13.1831	12.6579	7.07275	34.6333	77.9826	31.5973	up	23	14	8	30	78	22	chr16	30483826	30484263	+	6	circRNA	WWC3	NM_015691	chrX:10015858-10063444|chrX:10094281-10098505
chr1:108657450:108659962:-	5.15643	0.0411	0.929986	0	0	0	0	7.99821	7.1812	up	0	0	0	0	8	5	chr1	108657450	108659962	-	8	circRNA	ARMCX4	NR_045861	chrX:101487691-101488043|chrX:101532012-101533083
chr3:11358417:11380052:+	3.53877	0.0414562	0.929986	2.29271	0	0	6.92666	10.9975	11.4899	up	4	0	0	6	11	8	chr3	11358417	11380052	+	5	circRNA	PAK3	NM_001128166	chrX:111123278-111142095|chrX:111163727-111173017
chr11:118489791:118493230:+	-4.54248	0.0414935	0.929986	0	27.124	2.65228	0	0.999777	0	down	0	30	3	0	1	0	chr11	118489791	118493230	+	5	circRNA	KMT2A	NM_001197104	chr11:118488760-118489791|chr11:118493230-118494287
chr6:42632551:42637194:+	4.89234	0.0418195	0.929986	0	0	0	2.30889	5.99866	4.30872	up	0	0	0	2	6	3	chr6	42632551	42637194	+	3	circRNA	KLHL13	NM_033495	chrX:117910096-117919520|chrX:117945575-117972730
chr8:89970363:89978323:-	4.89234	0.0418195	0.929986	0	0	0	2.30889	5.99866	4.30872	up	0	0	0	2	6	3	chr8	89970363	89978323	-	15	circRNA	DOCK11	NM_144658	chrX:118566182-118566573|chrX:118599228-118605237
chr7:2360709:2364529:+	4.87976	0.0421482	0.929986	0	0	0	4.61777	4.99888	2.87248	up	0	0	0	4	5	2	chr7	2360709	2364529	+	3	circRNA	WDR44	NM_001184965	chrX:118395344-118396969|chrX:118404444-118406874
chr8:101543240:101558812:+	3.3062	0.0422669	0.929986	1.14635	0	7.07275	1.15444	4.99888	74.6845	up	2	0	8	1	5	52	chr8	101543240	101558812	+	4	circRNA	WDR44	NM_001184965	chrX:118398470-118404337|chrX:118410959-118432780
chr10:126970701:127043164:+	4.92109	0.0423035	0.929986	0	0	0	1.15444	5.99866	5.74496	up	0	0	0	1	6	4	chr10	126970701	127043164	+	2	circRNA	ZNF782	NM_001001662	chr9:96819778-96827079|chr9:96845016-96851946
chr1:32942251:32949774:-	4.91306	0.0423374	0.929986	0	0	0	2.30889	1.99955	8.61744	up	0	0	0	2	2	6	chr1	32942251	32949774	-	3	circRNA	ARMCX5-GPRASP2	NR_146584	chrX:102839972-102845856|chrX:102884808-102897573
chr5:72861807:72865729:+	4.59982	0.0423563	0.929986	0.573177	0	0	15.0078	4.99888	0	up	1	0	0	13	5	0	chr5	72861807	72865729	+	3	circRNA	PLS3	NM_001282337	chrX:115561260-115610242|chrX:115622409-115629197
chrX:131749305:131794466:-	3.06309	0.0429687	0.929986	1.14635	18.0827	15.9137	1.15444	9.99777	281.503	up	2	20	18	1	10	196	chrX	131749305	131794466	-	2	circRNA	DOCK11	NM_144658	chrX:118615711-118618549|chrX:118624655-118627503
chr1:113848539:113855049:-	3.70112	0.0429754	0.929986	0	0	2.65228	10.39	20.9953	1.43624	up	0	0	3	9	21	1	chr1	113848539	113855049	-	4	circRNA	ARMCX4	NR_028407	chrX:101499366-101504936|chrX:101511055-101524203
chr2:69354488:69363670:-	3.17287	0.0431851	0.929986	1.14635	0	3.53637	2.30889	27.9938	11.4899	up	2	0	4	2	28	8	chr2	69354488	69363670	-	2	circRNA	AMMECR1	NM_015365	chrX:110202536-110216517|chrX:110264599-110317598
chr8:101558418:101558812:+	3.11197	0.0433753	0.929986	6.87812	0	2.65228	1.15444	12.9971	70.3758	up	12	0	3	1	13	49	chr8	101558418	101558812	+	4	circRNA	WDR44	NM_001184965	chrX:118436824-118441367|chrX:118443687-118444359
chr1:176149005:176163891:-	3.8546	0.0436325	0.929986	0	0	1.76819	3.46333	11.9973	8.61744	up	0	0	2	3	12	6	chr1	176149005	176163891	-	7	circRNA	ARMCX5-GPRASP2	NR_146587	chrX:102721027-102816991|chrX:102865152-102884142
chr3:188609160:188609844:+	-2.67292	0.0437379	0.929986	10.8904	11.7537	29.1751	4.61777	1.99955	1.43624	down	19	13	33	4	2	1	chr3	188609160	188609844	+	1	circRNA	LPP	NM_005578	chr3:188524787-188609160|chr3:188609844-188708266
chr6:85557975:85574378:-	4.08295	0.0440327	0.929986	1.14635	0	0	12.6989	7.99821	1.43624	up	2	0	0	11	8	1	chr6	85557975	85574378	-	7	circRNA	WDR44	NM_001184965	chrX:118346580-118378418|chrX:118398470-118404337
chr2:63404047:63439871:-	4.11916	0.0440469	0.929986	0	0	1.76819	1.15444	0.999777	27.2886	up	0	0	2	1	1	19	chr2	63404047	63439871	-	13	circRNA	ACSL4	NM_001318509	chrX:109644186-109659353|chrX:109683666-109696143
chr9:136446854:136448161:-	4.86719	0.0442716	0.929986	0	0	0	2.30889	2.99933	7.1812	up	0	0	0	2	3	5	chr9	136446854	136448161	-	9	circRNA	DOCK11	NM_144658	chrX:118580179-118584734|chrX:118599228-118605237
chr22:38245934:38248019:-	3.0965	0.0442985	0.929986	2.29271	0	1.76819	4.61777	20.9953	10.0537	up	4	0	2	4	21	7	chr22	38245934	38248019	-	2	circRNA	MID1	NM_001193277	chrX:10495691-10523091|chrX:10567603-10576783
chr3:175096789:175097291:+	4.55105	0.0446149	0.929986	0	0	0.884093	0	7.99821	11.4899	up	0	0	1	0	8	8	chr3	175096789	175097291	+	11	circRNA	PAK3	NM_001128166	chrX:111123278-111142095|chrX:111196640-111216420
chr13:42926335:42970670:-	2.92135	0.0449381	0.929986	1.71953	0	5.30456	8.08111	35.992	8.61744	up	3	0	6	7	36	6	chr13	42926335	42970670	-	3	circRNA	CORO2A	NM_003389	chr9:98126823-98128169|chr9:98129890-98130954
chr11:103303092:103312033:+	-4.58963	0.0450077	0.929986	2.29271	10.8496	2.65228	0	0	0	down	4	12	3	0	0	0	chr11	103303092	103312033	+	4	circRNA	DYNC2H1	NM_001080463	chr11:103287605-103303092|chr11:103312033-103316544
chr6:144487547:144511123:+	-4.01983	0.0451978	0.929986	6.30494	9.04134	5.30456	0	0.999777	0	down	11	10	6	0	1	0	chr6	144487547	144511123	+	7	circRNA	UTRN	NM_007124	chr6:144485519-144487547|chr6:144511123-144513908
chr8:15730665:15748465:+	4.89692	0.0453057	0.929986	0	0	0	1.15444	2.99933	8.61744	up	0	0	0	1	3	6	chr8	15730665	15748465	+	4	circRNA	WDR44	NM_001184965	chrX:118441559-118442243|chrX:118444494-118448892
chr5:53603451:53604895:+	4.83725	0.0453816	0.929986	0	0	0	3.46333	2.99933	5.74496	up	0	0	0	3	3	4	chr5	53603451	53604895	+	7	circRNA	LRCH2	NM_001243963	chrX:115113335-115122526|chrX:115150070-115156601
chr8:124320085:124327421:-	4.83725	0.0453816	0.929986	0	0	0	3.46333	2.99933	5.74496	up	0	0	0	3	3	4	chr8	124320085	124327421	-	5	circRNA	WDR44	NM_001184965	chrX:118436824-118441367|chrX:118444494-118448892
chr15:63553714:63574403:+	4.32568	0.0456156	0.929986	0	0	0.884093	8.08111	6.99844	1.43624	up	0	0	1	7	7	1	chr15	63553714	63574403	+	2	circRNA	TGFBR1	NM_001130916	chr9:99129100-99137858|chr9:99142703-99144731
chr3:197814907:197820430:+	-3.0371	0.0458115	0.929986	6.30494	18.9868	14.1455	0	1.99955	2.87248	down	11	21	16	0	2	2	chr3	197814907	197820430	+	3	circRNA	LRCH3	NM_032773	chr3:197791540-197814907|chr3:197820430-197826877
chr18:26052623:26078160:-	3.87012	0.0458185	0.929986	0	0	1.76819	13.8533	1.99955	8.61744	up	0	0	2	12	2	6	chr18	26052623	26078160	-	9	circRNA	TRMT2B	NM_001167970	chrX:101019403-101020486|chrX:101042312-101051643
chr8:6724869:6747828:+	3.39392	0.0460968	0.929986	1.14635	0	3.53637	2.30889	0.999777	45.9597	up	2	0	4	2	1	32	chr8	6724869	6747828	+	6	circRNA	DOCK11	NM_144658	chrX:118496073-118542724|chrX:118561517-118566004
chr1:155477885:155521618:-	4.59362	0.0462299	0.929986	0	0	0.884093	0	16.9962	2.87248	up	0	0	1	0	17	2	chr1	155477885	155521618	-	1	circRNA	ARMCX4	NR_045861	chrX:101511055-101531643|chrX:101532012-101533083
chr7:148832633:148847305:-	3.98725	0.0462382	0.929986	1.14635	0	0	3.46333	5.99866	11.4899	up	2	0	0	3	6	8	chr7	148832633	148847305	-	13	circRNA	WDR44	NM_001184965	chrX:118378452-118387339|chrX:118441559-118442243
chr14:76166662:76180849:+	-2.78068	0.0463019	0.929986	10.8904	31.6447	5.30456	3.46333	1.99955	1.43624	down	19	35	6	3	2	1	chr14	76166662	76180849	+	6	circRNA	GPATCH2L	NM_001322029	chr14:76155025-76166662|chr14:76180849-76195877
chr5:169803057:169840852:+	4.87571	0.0464626	0.929986	0	0	0	1.15444	6.99844	4.30872	up	0	0	0	1	7	3	chr5	169803057	169840852	+	2	circRNA	ARHGAP6	NM_013423	chrX:11182118-11186235|chrX:11188984-11196924
chr14:91669813:91708236:-	5.09939	0.0465235	0.929986	0	0	0	3.46333	10.9975	0	up	0	0	0	3	11	0	chr14	91669813	91708236	-	19	circRNA	COL15A1	NM_001855	chr9:98987368-98989177|chr9:99040556-99042044
chr11:82849048:82860117:-	5.08651	0.046712	0.929986	0	0	0	10.39	3.99911	0	up	0	0	0	9	4	0	chr11	82849048	82860117	-	4	circRNA	ANP32B	NM_006401	chr9:97983609-97994630|chr9:98011389-98012420
chr20:47294665:47298947:-	4.85004	0.047415	0.929986	0	0	0	5.77222	4.99888	1.43624	up	0	0	0	5	5	1	chr20	47294665	47298947	-	6	circRNA	LINC00630	NR_146589	chrX:102865152-102884142|chrX:102905737-102958647
chr4:77058506:77066405:-	4.82013	0.0474789	0.929986	0	0	0	2.30889	3.99911	5.74496	up	0	0	0	2	4	4	chr4	77058506	77066405	-	15	circRNA	ALG13	NM_001099922	chrX:111685103-111708026|chrX:111727770-111728184
chr18:79728906:79736521:+	4.8242	0.0476174	0.929986	0	0	0	5.77222	1.99955	4.30872	up	0	0	0	5	2	3	chr18	79728906	79736521	+	5	circRNA	TRMT2B	NM_001167970	chrX:101023616-101035612|chrX:101042312-101051643
chr6:25482256:25500235:+	4.8242	0.0476174	0.929986	0	0	0	5.77222	1.99955	4.30872	up	0	0	0	5	2	3	chr6	25482256	25500235	+	5	circRNA	MSL3	NM_001282174	chrX:11760498-11760836|chrX:11765729-11768572
chr3:71690009:71699708:-	3.20395	0.0477075	0.929986	4.01224	0	0	11.5444	17.996	10.0537	up	7	0	0	10	18	7	chr3	71690009	71699708	-	2	circRNA	PAK3	NM_001128166	chrX:111152447-111162914|chrX:111163727-111173017
chr15:40009613:40019200:+	4.80686	0.0478225	0.929986	0	0	0	4.61777	2.99933	4.30872	up	0	0	0	4	3	3	chr15	40009613	40019200	+	6	circRNA	TGFBR1	NM_001130916	chr9:99105302-99128854|chr9:99147784-99149179
chr21:15762890:15791664:+	4.80686	0.0478225	0.929986	0	0	0	4.61777	2.99933	4.30872	up	0	0	0	4	3	3	chr21	15762890	15791664	+	3	circRNA	FAM199X	NM_207318	chrX:104166982-104175622|chrX:104186621-104188039
chr3:12379703:12417154:+	-4.52785	0.0482979	0.929986	1.71953	7.23307	6.18865	0	0	0	down	3	8	7	0	0	0	chr3	12379703	12417154	+	5	circRNA	PPARG	NM_005037	chr3:12288020-12379703|chr3:12417154-12433897
chr17:39490556:39492890:+	2.76707	0.0487234	0.929986	4.01224	0	2.65228	11.5444	21.9951	12.9262	up	7	0	3	10	22	9	chr17	39490556	39492890	+	3	circRNA	WWC3	NM_015691	chrX:10079804-10090770|chrX:10098579-10109777
chr8:92005115:92017363:-	-4.29887	0.0487673	0.929986	14.3294	0	10.6091	1.15444	0	0	down	25	0	12	1	0	0	chr8	92005115	92017363	-	4	circRNA	RUNX1T1	NM_004349	chr8:91991889-92005115|chr8:92017363-92062545
chr14:35683808:35725153:-	4.83303	0.0490199	0.929986	0	0	0	4.61777	5.99866	1.43624	up	0	0	0	4	6	1	chr14	35683808	35725153	-	2	circRNA	COL15A1	NM_001855	chr9:98944250-98985564|chr9:98987368-98989177
chr1:155721516:155726019:+	2.862	0.049031	0.929986	5.15859	0	0.884093	17.3167	12.9971	15.7986	up	9	0	1	15	13	11	chr1	155721516	155726019	+	3	circRNA	CLCN4	NM_001830	chrX:10158551-10185021|chrX:10195098-10197938
chr5:179709872:179720560:+	3.22448	0.0490794	0.929986	1.14635	0	1.76819	6.92666	4.99888	15.7986	up	2	0	2	6	5	11	chr5	179709872	179720560	+	5	circRNA	AMOT	NM_133265	chrX:112791981-112804946|chrX:112832370-112840451
chr2:230269531:230287966:+	4.78937	0.0492295	0.929986	0	0	0	3.46333	3.99911	4.30872	up	0	0	0	3	4	3	chr2	230269531	230287966	+	5	circRNA	FRMPD3	NM_032428	chrX:107554504-107560256|chrX:107576459-107597320
chrX:24179182:24179770:+	4.78937	0.0492295	0.929986	0	0	0	3.46333	3.99911	4.30872	up	0	0	0	3	4	3	chrX	24179182	24179770	+	3	circRNA	DOCK11	NM_144658	chrX:118652077-118654601|chrX:118662792-118671022
chr10:5773841:5800705:-	2.49766	0.0492514	0.929986	7.4513	9.94547	8.84093	3.46333	19.9955	124.953	up	13	11	10	3	20	87	chr10	5773841	5800705	-	3	circRNA	LOC100499484-C9ORF174	NR_036527	chr9:97343563-97354568|chr9:97357725-97359981
chr19:9614020:9618179:-	4.28775	0.0497588	0.929986	0	0	0.884093	4.61777	9.99777	1.43624	up	0	0	1	4	10	1	chr19	9614020	9618179	-	18	circRNA	CENPI	NM_001318521	chrX:101098539-101101057|chrX:101148161-101162832
chr19:18175039:18175697:+	2.93433	0.0497851	0.929986	4.01224	0	0.884093	9.23555	12.9971	17.2349	up	7	0	1	8	13	12	chr19	18175039	18175697	+	3	circRNA	WWC3	NM_015691	chrX:10098579-10109777|chrX:10117689-10122618
